# Supplementary material for: The Safety and Efficacy of Systemic Delivery of a New Liver-de-targeted TGFβ Signaling Inhibiting Adenovirus in an Immunocompetent Triple Negative Mouse Mammary Tumor Model
Source: Research Square preprint supplement (doi:10.21203/rs.3.rs-3317863/v1), 2023-09-14
Supplement: Supplementary file 1 [file 58b0ffcaa56c7760e433a886.xlsx]

## Sheet: Figure 1
Figure 1A	Buffer	Ad(E-).null	Ad.sT	AdLyp.sT	mHAd.sT	mHAdLyp.sT
	0.248	121.895	1584.46	64.4593	6.88227	15.7774
	0.030176	96.1805	251.546	160.6	20.8537	31.2719
	0.009	219.503	754.594	150.343	36.7398	15.517
	0.041	81.6965	714	242.04	7.3779	1.77165
	0.018		119.985	53.176		32.181
Figure 1B	Buffer	Ad(E-).null	Ad.sT	AdLyp.sT	mHAd.sT	mHAdLyp.sT
	1.35019	439.928	62.6573	16.7241	11.2215	257.123
	2.43086	692.01	334.705	187.217	106.458	35.0045
	1.54279	207.902	416.401	9.44442	425.457	29.2731
	4.89895		214.991	207.313		44.2104
	1.13953					1.36014
Figure 1C	Buffer	Ad(E-).null	Ad.sT	AdLyp.sT	mHAd.sT	mHAdLyp.sT
	2.596	0.889	5.987	4.647	19.048	36.457
	0.592	31.066	8.148	23.582	1.874	10.417
	0.693	10.169	10.081	94.63	4.199	2.769
	0.538	8.395	32.106	1.678	10.298	29.946
	0.582		5.987	0.935		1.312
Figure 1D	Buffer	Ad(E-).null	Ad.sT	AdLyp.sT	mHAd.sT	mHAdLyp.sT
	0.153	1.344	2.122	2.854	0.569	2.295
	1.55	0.627	0.881	2.948	0.231	2.128
	1.611	1.66	2.421	0.317	5.694	1.186
	0.685		2.062	1.395		0.233
	1.483					1.25
Figure 1E	Buffer	Ad(E-).null	Ad.sT	AdLyp.sT	mHAd.sT	mHAdLyp.sT
	2.532	0.32	145.241	0.18	37.926	52.093
	0.7	0.096	6.217	186.312	0.116	0.314
	0.711	0.089	0.387	0.29	9.45	6.283
	0.435	0.071	0.11	0.105	0.111	151.443
	0.622		224.637	0.68		11.557
Figure 1F	Buffer	Ad(E-).null	Ad.sT	AdLyp.sT	mHAd.sT	mHAdLyp.sT
	7.12884	4.50873	10295.2	264.651	6517.56	2704.84
	34.8402	27.5663	14164.8	265.935	10941.4	2156.63
	23.5297	18.1629	6277.72	353.228	5670.05	1868.8
		17.9995	10894.4	270.772		3705.61

## Sheet: Figure 2
Figure 2A	Buffer	Ad(E-).null	Ad.sT	AdLyp.sT	mHAd.sT	mHAdLyp.sT
	207.119	1781.31	4567.08	3776.97	300.62	733.605
	1139.27	2531.89	2985.42	2959.32	223.821	1380.67
	350.956	2685.81	2581.09	3285.04	142.794	563.723
		2192.03	4654.08	4413.06		1293.84
Figure 2B	Buffer	Ad(E-).null	Ad.sT	AdLyp.sT	mHAd.sT	mHAdLyp.sT
	8.39734	5.51686	41.627	9.36566	1.90095	6.00716
	9.35341	5.21043	27.7722	17.0368	19.956	7.40449
	6.0807	5.72524	42.8159	12.8468	8.91214	6.48519
		4.0705	29.6883	14.3034		7.73544
Figure 2C	Buffer	Ad(E-).null	Ad.sT	AdLyp.sT	mHAd.sT	mHAdLyp.sT
	423.877	694.098	8183.46	698.072	453.901	320.998
	1794.41	634.49	1212.46	693.215	525.43	511.743
	691.448	616.387	524.106	8674.01	1183.76	677.761
		565.61	477.744	633.165		899.413
Figure 2D	Buffer	Ad(E-).null	Ad.sT	AdLyp.sT	mHAd.sT	mHAdLyp.sT
	1.40715	2.27414	13.3474	1.81134	0.781	0.403352
	0.100969	0.564802	1.97367	2.07165	1.599	1.48615
	0.892184	1.01693	5.31786	2.63135	1.297	1.58784
	1.22112	1.59803	2.70208	1.57091		1.06629
Figure 2E	Buffer	Ad(E-).null	Ad.sT	AdLyp.sT	mHAd.sT	mHAdLyp.sT
	47.8553	60.9532	341.305	323.32	51.248	80.9722
	78.4357	70.0782	224.571	284.837	52.163	54.9162
	12.6859	15.7163	173.286	117.588	46.281	46.476
	54.3813	23.3067	236.75	275.125		45.3138
Figure 1F	Buffer	Ad(E-).null	Ad.sT	AdLyp.sT	mHAd.sT	mHAdLyp.sT
	18.7422	17.6579	97.5728	56.1194	19.7559	23.6114
	15.6166	14.3941	50.4064	48.4076	32.6755	13.0956
	12.4851	5.15775	97.6356	59.024	16.5914	30.6726
	20.8907	5.35684	84.7784	42.6556		22.2722
Figure 2G	Buffer	Ad(E-).null	Ad.sT	AdLyp.sT	mHAd.sT	mHAdLyp.sT
	3.357	4.61901	8.99889	8.138	17.357	7.11526
	2.444	9.88693	10.7545	5.07	7.427	10.5131
	4.336	6.82346	39.71	3.994	15.647	6.06438
			27.8745	4.354		41.3081
	Buffer	Ad(E-).null	Ad.sT	AdLyp.sT	mHAd.sT	mHAdLyp.sT
Figure 2H	2.827	2.00495	5.17866	3.85194	2.35454	2.26489
	1.8964	2.38757	8.48731	6.31353	2.23069	3.47675
	1.29645	1.39296	6.78875	6.81543	1.76325	1.80369
	1.88359	1.87878	4.81207	4.70327		2.20503
Figure 2I	Buffer	Ad(E-).null	Ad.sT	AdLyp.sT	mHAd.sT	mHAdLyp.sT
	43.2196	53.9875	98.4332	65.7752	29.62	29.48
	31.5461	37.4889	102.996	69.6198	61.322	46.7737
	36.4652	37.0314	107.048	75.297	25.989	29.9432
	39.98	51.4122	89.3461	58.8629		43.1335
Figure 2J	Buffer	Ad(E-).null	Ad.sT	AdLyp.sT	mHAd.sT	mHAdLyp.sT
	1.41966	10.5484	67.1443	10.408	7.75802	3.33475
	0.45417	4.39787	57.9965	17.812	2.88239	11.0186
	0.583382	2.1137	23.5569	9.936	14.7147	10.1944
	3.14246	2.61543	21.8209	9.396		11.2469
Figure 2K	Buffer	Ad(E-).null	Ad.sT	AdLyp.sT	mHAd.sT	mHAdLyp.sT
	0.0693387	0.275618	0.133138	0.310046	0.508346	0.237011
	0.0613856	0.198531	0.383574	0.331483	0.415818	0.191679
	0.0162892	0.063801	0.544764	0.471748	0.294058	0.305438
	0.0787188	0.168827	0.192463	0.149826		0.366924
Figure 1L	Buffer	Ad(E-).null	Ad.sT	AdLyp.sT	mHAd.sT	mHAdLyp.sT
	68.94	29.835	7.515	15.6	18.81	4.725
	42.84	44.1	12.15	28.89	1.8	22.635
	36.27	23.805	20.97	18.06	9.315	17.775
		41.985	7.74	7.93		14.625

## Sheet: Figure 3
		TGFβ-1							IL-2							IL-12p35							IFN-γ
Figure 3A		Buffer	Ad(E-).null	Ad.sT	AdLyp.sT	mHAd.sT	mHAdLyp.sT		Buffer	Ad(E-).null	Ad.sT	AdLyp.sT	mHAd.sT	mHAdLyp.sT		Buffer	Ad(E-).null	Ad.sT	AdLyp.sT	mHAd.sT	mHAdLyp.sT		Buffer	Ad(E-).null	Ad.sT	AdLyp.sT	mHAd.sT	mHAdLyp.sT
Spleen		1.21539	0.723584	0.406445	0.883932	1.04789	0.126923		2.66342	0.240326	0.365221	1.09989	1.45264	2.04473		0.562924	0.096306	0.292856	0.040598	0.53034	1.15233		0.027234	0.753536	0.582093	0.959105	1.43749	1.13344
Day 14		0.595497	1.6473	1.01125	1.19419	0.103085	0.34547		1.43401	0.253668	1.21737	0.210758	4.03296	1.2937		1.03328	0.109833	0.395988	0.8434	1.29041	0.450011		0.128336	0.160827	2.45654	1.67942	0.048402	0.447193
		0.753517	0.771562	1.0241	1.39878	2.25693	0.312997		0.09786	1.14209	0.356375	1.11139	1.01754	1.12914		0.203306	0.96547	0.417852	0.67312	0.218253	1.22507		0.325031	0.301625	1.21807	0.856973	0.169305	0.546635
		2.18636	2.46661	0.445047	1.65539	1.67563	0.339785		0.083199	0.218394	1.05525	0.186014	0.776185	0.411403		0.367244	0.72876	1.22704	0.152347	0.5875	0.374267		0.458287	0.404586	1.49543	1.45767	0.83812	0.33763
		0.884155		0.89941	1.29871		0.431857		0.138694		0.318388	1.58655		1.58577		0.116881		0.320415	0.408131		0.376946		0.570581		1.58341	2.82676		1.02658
		TGFβ-1							IL-2							IL-12p35							IFN-γ
Figure 3B		Buffer	Ad(E-).null	Ad.sT	AdLyp.sT	mHAd.sT	mHAdLyp.sT		Buffer	Ad(E-).null	Ad.sT	AdLyp.sT	mHAd.sT	mHAdLyp.sT		Buffer	Ad(E-).null	Ad.sT	AdLyp.sT	mHAd.sT	mHAdLyp.sT		Buffer	Ad(E-).null	Ad.sT	AdLyp.sT	mHAd.sT	mHAdLyp.sT
Tumor		0.294	0.781	1.688	1.105	0.645	1.167		0.319	2.75233	1.73909	2.51595	4.86975	3.77248		2.384	1.337	2.569	4.548	1.139	2.67		0.201	2.13671	1.51049	0.366675	1.09021	1.57719
Day 14		1.495	2.091	1.508	0.19	0.99	0.869		0.649	3.44954	0.826538	4.15498	5.05391	0.892299		0.068	2.7	1.843	2.318	1.305	2.887		2.021	1.68229	1.01527	1.04184	1.08589	1.62287
		1.669	0.769	2.288	1.512	1.389	2.087		1.236	0.990592	2.12514	4.94604	3.25118	0.93924		0.185	2.143	3.097	4.484	1.094	2.565		1.025	1.00586	0.980874	1.16427	1.13473	0.653539
		0.887	1.061	0.845	0.928	1.19	0.584		2.328	3.09269	2.6063	6.40071	1.58155	1.91582		2.179	1.23	2.739	4.609	1.423	5.703		1.576	0.3129	0.806258	1.07812	1.55608	1.08001
		0.656		2.216	0.982		1.392		0.467		1.99245	7.8316		2.10195		0.185		0.939	5.96		4.166		0.177		0.461793	0.350344		1.05038
		TGFβ-1							IL-2							IL-12p35							IFN-γ
Figure 3C		Buffer	Ad(E-).null	Ad.sT	AdLyp.sT	mHAd.sT	mHAdLyp.sT		Buffer	Ad(E-).null	Ad.sT	AdLyp.sT	mHAd.sT	mHAdLyp.sT		Buffer	Ad(E-).null	Ad.sT	AdLyp.sT	mHAd.sT	mHAdLyp.sT		Buffer	Ad(E-).null	Ad.sT	AdLyp.sT	mHAd.sT	mHAdLyp.sT
Spleen		1.40922	2.96752	0.06826	1.05482	1.6835	0.032707		2.08106	1.04551	1.53337	1.2778	1.35839	5.19421		0.764568	0.180675	1.19525	0.531049	0.783982	0.583534		0.45784	0.190369	1.01915	0.417167	0.426195	0.627845
Day 25		2.49728	2.22087	0.41111	0.667965	1.26912	0.17536		2.59761	1.21945	1.70554	1.30359	1.24237	3.40073		0.697499	0.94637	0.344565	0.319385	0.685938	0.432623		0.512926	0.453304	0.378568	1.18361	0.770319	0.536486
		1.37052	4.09926	0.166699	0.121533	0.45422	0.126001		1.73042	0.424021	3.01792	5.48796	1.34896	2.60866		0.791909	0.203928	0.664923	1.85426	0.676	1.38807		0.316637	0.385083	1.2284	1.08029	1.0937	1.22903
		0.81586		0.132931	0.729783		0.14459		1.5737		3.11192	2.22125		4.49605		0.780114		0.690916	1.27008		0.593464		0.254552		2.6528	0.303507		1.15639
		1.34924					0.135281		1.37349					6.98754		0.666361					1.55921		0.393175					2.70666
		TGFβ-1							IL-2							IL-12p35							IFN-γ
Figure 3D		Buffer	Ad(E-).null	Ad.sT	AdLyp.sT	mHAd.sT	mHAdLyp.sT		Buffer	Ad(E-).null	Ad.sT	AdLyp.sT	mHAd.sT	mHAdLyp.sT		Buffer	Ad(E-).null	Ad.sT	AdLyp.sT	mHAd.sT	mHAdLyp.sT		Buffer	Ad(E-).null	Ad.sT	AdLyp.sT	mHAd.sT	mHAdLyp.sT
Tumor		0.669	1.547	0.422	0.91	0.344	0.133		0.681	0.634593	1.8432	6.35011	0.683885	1.47409		4.161	0.664	3.425	3.83	1.271	2.881		0.324	1.14221	1.76052	0.806377	1.74619	2.11288
Day 25		0.741	0.513	0.744	0.878	2.184	0.52		0.828	0.790967	1.31759	1.03831	1.5988	0.711289		0.157	0.303	1.59	3.356	1.113	1.322		0.812	0.468795	4.69059	1.70877	6.54921	7.17751
		0.706	1.368	0.543	1.669	0.183	0.601		1.018	1.33237	0.486449	1.15943	0.654682	0.88228		0.311	1.178	0.904	4.703	1.217	1.64		0.748	0.372539	1.63843	1.88464	1.55063	2.82965
		1.876		0.208	0.384		0.142		1.042		1.30787	0.634067		0.967132		0.28		1.572	1.004		1.797		1.559		4.32828	3.0968		6.94915
		1.007					1.798		1.432					0.524408		0.091					2.975		1.556					4.10747

## Sheet: Figure 4
		CD8+					CD8+CD44+CD62L+
Figure 4A		Normal	Buffer	mHAd.sT	mHAdLyp.sT		Normal	Buffer	mHAd.sT	mHAdLyp.sT
Blood		15.7	9.04	12	10.2		41.5	25.1	47.8	50.3
		17.3	8.79	9.57	10.1		31.9	17.8	48.6	51
			8.13	7.68	17.13			26.7	42.9	44.2
			14.1	20.5	7.63			19.7	31.2	33.6
			8.7		11.9			10.1		59.8
		CD8+					CD8+CD44+CD62L-
Figure 4B		Normal	Buffer	mHAd.sT	mHAdLyp.sT		Normal	Buffer	mHAd.sT	mHAdLyp.sT
Spleen		33.8	26.8	39	33.9		23.3	37.3	71.2	54.2
		31.4	25.1	35.9	36.4		23.1	64.4	65.5	73.8
			17.4	39.6	40.4			36.9	58.9	57.2
			17.5	42.1	28.7			18.7	61.4	64.3
			6.85		40.9			17.3		66.5
			CD8+					CD8+CD44+CD62L+
Figure 4C			Buffer	mHAd.sT	mHAdLyp.sT			Buffer	mHAd.sT	mHAdLyp.sT
Tumor			7.6	24.4	16.9			4	5.86	17.27
			11.5	12.5	17.7			1.72	21.1	11
			2.29	10.7	9.42			1.23	15.6	21.3
			3.26	13	23.8			20	18.3	40.9
			3.89		35.1			10		40

## Sheet: Figure 5
		CD86+ DC					g-MDSCs					m-MDSCs					M1					M2
Figure 5A		Normal	Buffer	mHAd.sT	mHAdLyp.sT		Normal	Buffer	mHAd.sT	mHAdLyp.sT		Normal	Buffer	mHAd.sT	mHAdLyp.sT		Normal	Buffer	mHAd.sT	mHAdLyp.sT		Normal	Buffer	mHAd.sT	mHAdLyp.sT
Blood		3.09	5.41	49.8	42.8		18.6	63.7	44.5	41		13.5	5.39	16.4	16.3		7.4	1.13	6.2	4.66		0.14	48.7	34.7	32
		1.51	32.2	56.6	45.2		6.19	48.2	34.5	37.9		24.5	6.65	13.8	25.6		9.43	1.79	6.37	8.57		0.9	37.9	33	24
			19.8	10.4	36.6			65.5	25.7	36.2			4.54	19.7	13.79			1.48	7	7.57			54.8	26.8	34.8
			1.58	20.2	17.91			61.1	30.8	51.9			3.02	7.08	8.34			3.78	2.93	4.21			39.08	10	28.7
					45.6					25.7					13.1					6.33					19.4
Figure 5B		CD86+ DC
Spleen		Normal	Buffer	mHAd.sT	mHAdLyp.sT
		5.59	8.21	13	10.8
		6.61	7.77	8.19	11.4
			8.87	10.6	8.14
			6.22	8.84	10.2
					12.3
Figure 5C							g-MDSCs					m-MDSCs					M1					M2
Tumor								Buffer	mHAd.sT	mHAdLyp.sT			Buffer	mHAd.sT	mHAdLyp.sT			Buffer	mHAd.sT	mHAdLyp.sT			2.35	3.16	2.04
								35.9	19.7	26.3			8	26.4	18.8			8.58	22.4	20.5			3.19	6.78	3.54
								39.2	24.1	29.6			12.9	11.6	15.3			12.9	27.4	21.6			1.64	1.87	1.67
								48.9	34.1	26.7			7.8	16	9.19			11.8	16.71	15			0.21	1.84	2.48
								66.5	15.7	14.5			2.33	17.3	12.2			7.08	11.14	9.64					4.24
										32.9					14.73					17.76

## Sheet: Figure 6
Tumor Day 25
Figure 6A		CD8+				CD8+IFN-γ+
		Buffer	mHAd.sT	mHAdLyp.sT		Buffer	mHAd.sT	mHAdLyp.sT
		3.68	7.41	6.34		1.23	3.38	3.33
		1.67	5.62	16		0.85	1.53	1.29
		2.04	12.4	8.07		0.61	4.92	1.92
		1.33		7.01		0.62		1.52
		6.48		8.6		1.93		3.05
Figure 6B		m-MDSCs
		Buffer	mHAd.sT	mHAdLyp.sT
		4.01	9.1	12.92
		4.79	3.3	14.3
		7.18	7.89	6.8
		7.09		8.24
		10		12.2
Figure 6C		M1
		Buffer	mHAd.sT	mHAdLyp.sT
		7.86	23.6	10.38
		6.45	8.09	21
		15.8	16.6	20
		9.83		19.7
		14.3		17.4

## Sheet: Figure 7
Figure 7A		days	Buffer							mHAdLyp.sT							PD-1						CTLA-4					PD-1 + CTLA-4						mHAdLyp.sT + PD-1						mHAdLyp.sT + CTLA-4						mHAdLyp.sT + PD-1 + CTLA-4
Tumor volume		6	118.71	39.8	75.16	43.37	63.32	83.83		0.46	22.15	0.01	0.01	0.01	78.68		48.63	26.24	75.3	476.97	52.27		29.72	0.01	21.36	0.01		117.51	10.94	0.06	72.24	53.08		150.17	36.79	18.4	66.39	17.38		150.17	36.79	18.4	66.39	17.38		48.3	57.28	40.52	55.39
		9	79.17	68.22	244.24	132.27	197.03	136.15		105.48	220.31	45.3	121.6	72.05	54.59		72.57	18.45	52.89	87.33	31.76		115.64	77.74	113.12	44.31		196.94	33.12	95.51	117.97	53.27		107.68	54.71	83.58	41.56	53.91		107.68	54.71	83.58	41.56	53.91		92.7	59.29	69.25	81.49
		13	192.77	266.07	520.72	699.44	363.26	293.73		319.64	455.84	156.88	260.98	564.39	226.78		187.04	524.1	207.26	677.09	165.73		240.19	353.96	135.16	168.59		258.77	69.45	578.53	301.95	161.4		259.46	468.19	172.76	199.07	131.92		259.46	468.19	172.76	199.07	131.92		288.12	105.55	127.48	123.45
		16	287.9	328.44	855.87	1157.85	619.9	629.85		725.71	846.93	519.54	328.67	1178.52	323.72		323.08	339.01	679.38	961.67	299.82		478.39	284.99	173.74	262.93		198.82	784.65	263.65	814.14	516.75		346.54	595.38	192.48	261.1	470.76		346.54	595.38	192.48	261.1	470.76		565.79	154.5	173.03	248.78
		20	410.74	339.86	1510.39	1110	636.45	835.87		1264.88	1028.22	747.59	747.62	1917.26	535.23		450.06	489.23	763.8	1554.18	371.93		367.07	491.83	326.84	407.02		118.21	887.29	308.56	1012.36	201.44		724.26	757.86	237.71	567.8	990.21		724.26	757.86	237.71	567.8	990.21		617	138.59	193.72	253.6
		23	640.24	634.1	2263.66	1977.13	1278.66	1120.67		1532.01	814.28	960.3	825.19	2294.47	592.34		607.8	528.89	739.76	1957.3	415.75		857.11	774.35	1063.36	617.27		74.83	1271.26	610.47	1213.03	780.83		1100.45	1114.99	805.64	612.07	1531.11		699.44	1114.99	805.64	612.07	1531.11		802.86	331.14	320.16	695.68
Figure 7B		Buffer	mHAdLyp.sT	anti-PD-1 (P)	anti-CTLA-4 (C)	P + C	mHAdLyp.sT + P	mHAdLyp.sT + C	mHAdLyp.sT + P + C
Tumor weight		0.86	1.12	1.76	1.79	0.66	0.63	2.09	0.43
		0.74	1.47	0.53	0.41	0.98	0.73	1.26	0.52
		0.87	1.49	0.54	0.91	1.32	1.02	2.12	0.37
		0.64	1.13	1.95	1.93	0.18	1.84	0.67	0.28
		2.1	0.75	2.95		0.11	1.7	1.59	1.06
		2.22	0.6
Figure 7C		Buffer	mHAdLyp.sT	anti-PD-1 (P)	anti-CTLA-4 (C)	P + C	mHAdLyp.sT + P	mHAdLyp.sT + C	mHAdLyp.sT + P + C
lung metastasis		14.8961	0	1.23412	2.24173	1.98528	3.43478	0	0.33299
		15.5816	0.64978	7.63118	2.66289	2.17629	0	5.0266	3.26149
		9.04666	7.77302	9.0262	2.01898	2.78062	3.18398	2.74795	0.408994
		9.29065	2.65806	2.47778	3.14981	0.346285	0	0	0
		8.47296	2.80757	16.9125		0	3.04998	2.07204	0.126252
		16.7277	0
[truncated: 1 more columns]
